# Supplementary material for: DNA Compaction and Charge Inversion Induced by Organic Monovalent Ions
Source: PubMed Central journal article supplement (PMC6431901; doi:10.3390/polym9040128), 2017-03-30
Supplement: polymers-09-00128-s001.pdf [file polymers-09-00128-s001.pdf]

# Supplementary Materials: DNA Compaction and Charge Inversion Induced by Organic Monovalent Ions

Wenyan Xia, Yanwei Wang, Anthony Yang and Guangcan Yang

Tables S1 and S2 show the condensing force and unravelling forces of DNA at various concentrations of  $\text{Ph}_4\text{As}^+$ , which were measured by tethering DNA in flow cells of magnetic tweezers. The average values of both condensing and unravelling forces increased with the concentration of arsenic ions, indicating the tendency of DNA compaction. The particle sizes of DNA in Table S3 show the similar compacting trend.

**Table S1.** The condensing force of DNA at different concentrations of  $\text{Ph}_4\text{As}^+$ .

| Concentration (mM) | Unravelling force (pN) |      |      |      |      |      |      |      |      |      | Average value |
|--------------------|------------------------|------|------|------|------|------|------|------|------|------|---------------|
| 0.005              | 0.90                   | 0.87 | 0.81 | 0.79 | 0.84 | 0.77 | 0.86 | 0.82 | 0.79 | 0.85 | 0.83          |
| 0.01               | 2.36                   | 2.38 | 2.41 | 2.40 | 2.33 | 2.34 | 2.42 | 2.31 | 2.39 | 2.46 | 2.38          |
| 0.05               | 3.21                   | 3.24 | 3.13 | 3.20 | 3.19 | 3.11 | 3.21 | 3.14 | 3.23 | 3.24 | 3.19          |

**Table S2.** The unravelling force of DNA at different concentrations of  $\text{Ph}_4\text{As}^+$ .

| Concentration (mM) | Condensing force (pN) |      |      |      |      |      |      |      |      |      | Average value |
|--------------------|-----------------------|------|------|------|------|------|------|------|------|------|---------------|
| 0.001              | 0.51                  | 0.48 | 0.60 | 0.62 | 0.43 | 0.54 | 0.51 | 0.46 | 0.53 | 0.62 | 0.53          |
| 0.005              | 0.58                  | 0.72 | 0.61 | 0.59 | 0.71 | 0.65 | 0.56 | 0.67 | 0.62 | 0.69 | 0.64          |
| 0.01               | 1.68                  | 1.73 | 1.82 | 1.78 | 1.74 | 1.84 | 1.73 | 1.69 | 1.78 | 1.81 | 1.76          |
| 0.05               | 1.88                  | 2.03 | 2.02 | 1.89 | 2.10 | 2.01 | 1.99 | 1.86 | 1.87 | 1.85 | 1.95          |
| 0.1                | 2.73                  | 2.65 | 2.69 | 2.71 | 2.68 | 2.70 | 2.74 | 2.61 | 2.67 | 2.62 | 2.68          |
| 0.5                | 2.83                  | 2.80 | 2.76 | 2.61 | 2.69 | 2.81 | 2.79 | 2.74 | 2.63 | 2.64 | 2.73          |
| 1                  | 3.07                  | 3.12 | 3.18 | 3.21 | 3.16 | 3.11 | 3.24 | 3.11 | 3.05 | 3.15 | 3.14          |

**Table S3.** The particle size of DNA at different concentrations of  $\text{Ph}_4\text{As}^+$ .

| Concentration (mM) | Particle size (nm) |     |     |     |     | Average value |
|--------------------|--------------------|-----|-----|-----|-----|---------------|
| 0.01               | 313                | 308 | 309 | 311 | 309 | 310           |
| 0.05               | 297                | 296 | 301 | 306 | 300 | 300           |
| 0.1                | 214                | 211 | 207 | 206 | 212 | 210           |
| 0.5                | 206                | 198 | 203 | 197 | 196 | 200           |
| 1                  | 187                | 183 | 176 | 178 | 176 | 180           |
|                    | 186                | 185 | 178 | 173 | 188 | 182           |
| 3                  | 176                | 183 | 180 | 178 | 183 | 180           |
